# Supplementary material
Source: Springer Nature journal article supplement (https://www.springermedizin.de/resource/supplementary/12993_2011_353_MOESM10_ESM.pdf/9617586)

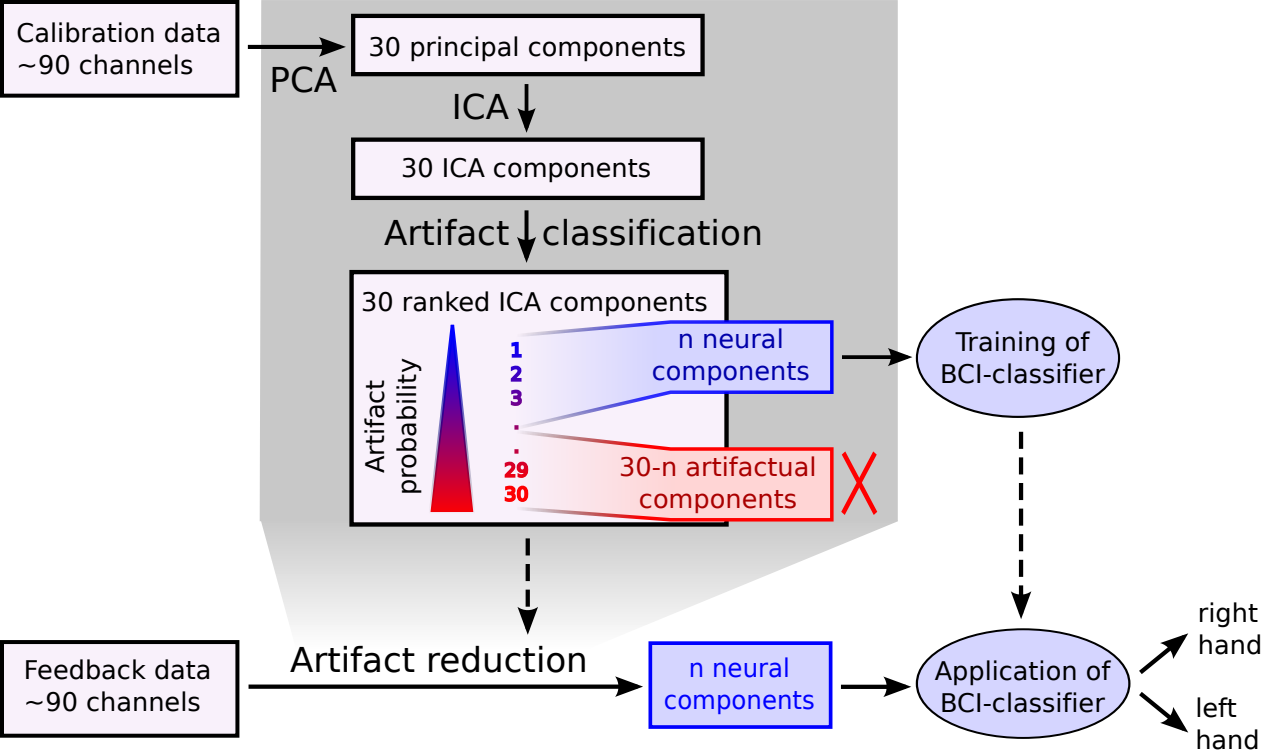

Supplement: MOESM10 [file 9617586]
